# Supplementary material for: Assessing Animal Welfare Impacts in the Management of European Rabbits (Oryctolagus cuniculus), European Moles (Talpa europaea) and Carrion Crows (Corvus corone)
Source: PLOS journal article supplement (doi:10.1371/journal.pone.0146298), 2016-01-04
Supplement: S14 (10.1371/journal.pone.0146298.s014) [file journal.pone.0146298.s014]

| Overall impact on welfare | Duration of impact   |         |       |      |       |
|---------------------------|----------------------|---------|-------|------|-------|
|                           | Immediate to Seconds | Minutes | Hours | Days | Weeks |
| EXTREME                   | 5                    | 6       | 7     | 8    | 8     |
| SEVERE                    | 4                    | 5       | 6     | 7    | 8     |
| MODERATE                  | 3                    | 4       | 5     | 6    | 7     |
| MILD                      | 2                    | 3       | 4     | 5    | 6     |
| NO IMPACT                 | 1                    | 1       | 1     | 1    | 1     |
