# Supplementary material for: Assessing Animal Welfare Impacts in the Management of European Rabbits (Oryctolagus cuniculus), European Moles (Talpa europaea) and Carrion Crows (Corvus corone)
Source: PLOS journal article supplement (doi:10.1371/journal.pone.0146298), 2016-01-04
Supplement: S17 (10.1371/journal.pone.0146298.s017) [file journal.pone.0146298.s017]

|                        |                                     |
|------------------------|-------------------------------------|
| <b>Control method:</b> | <b>Shooting rabbits - head shot</b> |
|------------------------|-------------------------------------|

|             |                                                                                                                                                                                                                                                                                                                                                                                                                                                                                                                                                                                                                                                                                                                                                                                                                                                                                                                                                                                    |
|-------------|------------------------------------------------------------------------------------------------------------------------------------------------------------------------------------------------------------------------------------------------------------------------------------------------------------------------------------------------------------------------------------------------------------------------------------------------------------------------------------------------------------------------------------------------------------------------------------------------------------------------------------------------------------------------------------------------------------------------------------------------------------------------------------------------------------------------------------------------------------------------------------------------------------------------------------------------------------------------------------|
| Assumptions | <p>Best practice is followed in accordance with the Standard Operating Procedure S1.</p> <p>Shooter uses appropriate gun and ammunition, is competent, and judges shot placement and range accurately.</p> <p>Head shots are preferred but chest shots more likely at greater distances.</p> <p>Wounding rates should be low if Standard Operating Procedure is followed (but rabbits are often shot by non-professionals).</p> <p>Shooting is not recommended as a primary rabbit control technique, but may be useful as part of wider management effort.</p> <p>Rabbits are often targeted when feeding in a group.</p> <p>The impacts in Part A of the assessment were considered for a number of rabbits feeding together. The first rabbit would be naïve but the impact would probably increase for each successive rabbit shot in a particular shooting exercise.</p> <p>Rabbits may breed year-round but the impact of shooting on dependent kittens is not assessed.</p> |
|-------------|------------------------------------------------------------------------------------------------------------------------------------------------------------------------------------------------------------------------------------------------------------------------------------------------------------------------------------------------------------------------------------------------------------------------------------------------------------------------------------------------------------------------------------------------------------------------------------------------------------------------------------------------------------------------------------------------------------------------------------------------------------------------------------------------------------------------------------------------------------------------------------------------------------------------------------------------------------------------------------|

**PART A: assessment of overall welfare impact**

|                                                         |             |                 |               |                |
|---------------------------------------------------------|-------------|-----------------|---------------|----------------|
| <b>DOMAIN 1 Water or food restriction, malnutrition</b> |             |                 |               |                |
| No impact                                               | Mild impact | Moderate impact | Severe impact | Extreme impact |

|                                         |             |                 |               |                |
|-----------------------------------------|-------------|-----------------|---------------|----------------|
| <b>DOMAIN 2 Environmental challenge</b> |             |                 |               |                |
| No impact                               | Mild impact | Moderate impact | Severe impact | Extreme impact |

|                                                        |             |                 |               |                |
|--------------------------------------------------------|-------------|-----------------|---------------|----------------|
| <b>DOMAIN 3 Disease, injury, functional impairment</b> |             |                 |               |                |
| No impact                                              | Mild impact | Moderate impact | Severe impact | Extreme impact |

|                                                        |             |                 |               |                |
|--------------------------------------------------------|-------------|-----------------|---------------|----------------|
| <b>DOMAIN 4 Behavioural or interactive restriction</b> |             |                 |               |                |
| No impact                                              | Mild impact | Moderate impact | Severe impact | Extreme impact |

|                                                               |             |                 |               |                |
|---------------------------------------------------------------|-------------|-----------------|---------------|----------------|
| <b>DOMAIN 5 Anxiety, fear, pain, distress, thirst, hunger</b> |             |                 |               |                |
| No impact                                                     | Mild impact | Moderate impact | Severe impact | Extreme impact |

|                |
|----------------|
| Overall impact |
| Mild impact    |

|                           |         |       |      |       |
|---------------------------|---------|-------|------|-------|
| <b>DURATION OF IMPACT</b> |         |       |      |       |
| Immediate to seconds      | Minutes | Hours | Days | Weeks |

|                          |            |
|--------------------------|------------|
| <b>SCORE FOR PART A:</b> | <b>2-3</b> |
|--------------------------|------------|

|                            |                                                                                                                                                                                                                                                                                                                                                                                                                                                                                                                                                                                                                                                                                                                      |
|----------------------------|----------------------------------------------------------------------------------------------------------------------------------------------------------------------------------------------------------------------------------------------------------------------------------------------------------------------------------------------------------------------------------------------------------------------------------------------------------------------------------------------------------------------------------------------------------------------------------------------------------------------------------------------------------------------------------------------------------------------|
| <i>Summary of evidence</i> |                                                                                                                                                                                                                                                                                                                                                                                                                                                                                                                                                                                                                                                                                                                      |
| Domain 1                   | No impact in this domain.                                                                                                                                                                                                                                                                                                                                                                                                                                                                                                                                                                                                                                                                                            |
| Domain 2                   | No impact in this domain.                                                                                                                                                                                                                                                                                                                                                                                                                                                                                                                                                                                                                                                                                            |
| Domain 3                   | No impact in this domain.                                                                                                                                                                                                                                                                                                                                                                                                                                                                                                                                                                                                                                                                                            |
| Domain 4                   | Rabbits form stable and lasting social groups (Marsh, 2009, cited in Sharp & Saunders, 2009), and are usually shot at in a group. If several rabbits from the same group are shot in a single shooting bout then by the time a particular rabbit is shot it is likely to have experienced the shooting of other members of its group, experiencing disturbance as a result.                                                                                                                                                                                                                                                                                                                                          |
| Domain 5                   | Rabbits may suffer briefly before being shot if another nearby rabbit is shot first, as a result experiencing fear/panic from the noise, the general disturbance, alarmed animals escaping. In such cases, remaining rabbits are most likely to try to go to ground, either avoiding being shot, being shot before they reach cover, or going to ground and then resurfacing to be shot minutes later during the same shooting bout. In the meantime, rabbits will exhibit natural 'flight or fight' stress response as when encountering a predator. These endocrine responses are short-term and stress hormone levels would quickly return to normal if the rabbit should escape being shot (Munck et al., 1984). |

|                                       |                                     |
|---------------------------------------|-------------------------------------|
| PART B: assessment of mode of death - | <b>Shooting rabbits - head shot</b> |
|---------------------------------------|-------------------------------------|

|                                                                                                 |                |                    |                  |                   |
|-------------------------------------------------------------------------------------------------|----------------|--------------------|------------------|-------------------|
| Time to insensibility (minus any lag time)                                                      |                |                    |                  |                   |
| Immediate to seconds                                                                            | Minutes        | Hours              | Days             | Weeks             |
| Level of suffering (after application of the method that causes death but before insensibility) |                |                    |                  |                   |
| No suffering                                                                                    | Mild suffering | Moderate suffering | Severe suffering | Extreme suffering |

|                     |                                                                                                                                                                                                                                                                                                                                                              |
|---------------------|--------------------------------------------------------------------------------------------------------------------------------------------------------------------------------------------------------------------------------------------------------------------------------------------------------------------------------------------------------------|
| SCORE FOR PART B:   | <b>A</b>                                                                                                                                                                                                                                                                                                                                                     |
| Summary of evidence |                                                                                                                                                                                                                                                                                                                                                              |
| Duration            | Well-placed head shots, made at the correct range, should cause immediate insensibility (Longair, 1991).                                                                                                                                                                                                                                                     |
| Suffering           | A head shot that destroys sufficient brain tissue to render an animal immediately insensible should not cause any suffering (AVMA, 2001). Cortisol levels and haematology parameters among rabbits that had been shot or trapped indicated that shooting does not produce a significant stress response (Hamilton & Weeks Jr., 1985; Jacobson et al., 1978). |

### Summary

|                          |                                                                                                                                                                                                                                                                                                                                                                                                                                                                                                                                                                                                                                                                                                                                                                                                                                                                                                                                                                                                                                                                                                                                                                                                                                                                                                                                           |
|--------------------------|-------------------------------------------------------------------------------------------------------------------------------------------------------------------------------------------------------------------------------------------------------------------------------------------------------------------------------------------------------------------------------------------------------------------------------------------------------------------------------------------------------------------------------------------------------------------------------------------------------------------------------------------------------------------------------------------------------------------------------------------------------------------------------------------------------------------------------------------------------------------------------------------------------------------------------------------------------------------------------------------------------------------------------------------------------------------------------------------------------------------------------------------------------------------------------------------------------------------------------------------------------------------------------------------------------------------------------------------|
| CONTROL METHOD           | <b>Shooting rabbits - head shot</b>                                                                                                                                                                                                                                                                                                                                                                                                                                                                                                                                                                                                                                                                                                                                                                                                                                                                                                                                                                                                                                                                                                                                                                                                                                                                                                       |
| OVERALL HUMANENESS SCORE | <b>2-3A</b>                                                                                                                                                                                                                                                                                                                                                                                                                                                                                                                                                                                                                                                                                                                                                                                                                                                                                                                                                                                                                                                                                                                                                                                                                                                                                                                               |
| Comments                 | <p>Wounding rates - this assessment assumed that rabbits were shot according to best practice, i.e. with the appropriate weapon and ammunition, from a suitable distance, and the shot accurately placed. However, studies with foxes have suggested that a proportion of the foxes shot at are wounded. One study, based on x-ray evidence of shooting wounds among animals admitted to wildlife hospitals and vets, estimated wounding rates to be 9% with shotguns and 3% with rifles (Bentley et al. unpublished data, in Baker et al., 2006). Another study examined the accuracy of shooting, by shooters of varying skill levels, at life-size paper fox targets, and estimated that wounding rates could be considerably greater (Fox et al., 2005).</p> <p>Hydrostatic shock - when an animal is shot its organs can be damaged both by the projectile and by the pressure wave or hydrostatic shock produced when the projectile enters the body (Courtney &amp; Courtney, 2008). In some cases the pressure wave produced may be of sufficient pressure to kill an animal before it dies of blood loss effects (Courtenay &amp; Courtenay, 2007).</p> <p>Individual rabbits that are part of a population that is managed by shooting, but that are not themselves shot, may suffer 'non-target' Part A effects over time.</p> |

### Bibliography

American Veterinary Medical Association (2001). 2000 Report of the AVMA Panel on Euthanasia. *Journal of the American Veterinary Medical Association*, 218 (5): 669-696.

Baker, P., Harris, S. and White, P. (2006). After the hunt. The future for foxes in Britain. International Fund for Animal Welfare (IFAW), London, UK. <http://www.thefoxwebsite.org/After-the-Hunt.pdf>.

Courtney, A. and Courtney, M. (2007). Links between traumatic brain injury and ballistic pressure waves originating in the thoracic cavity and extremities. *Brain Injury*, 21: 657-662.

Courtney, M. and Courtney, A. (2008). *Scientific Evidence for Hydrostatic Shock*. 0803.3051 at <<http://arxiv.org/abs/0803.3051>>

Fox, N.C., Blay, N., Greenwood, A.G., Wise, D. and Potapov, E. (2005). Wounding rates in shooting foxes (*Vulpes vulpes*). *Animal Welfare*, 14: 93-102

Hamilton, G.D. and Weeks, H.P. (1985). Cortisol and aldosterone comparisons of cottontail rabbits collected by shooting, trapping, and falconry. *Journal of Wildlife Diseases*, 21 (1): 40-42.

Jacobson, H.A., Kirkpatrick, R.L., Burkhart, H.E. and Davis, J.W. (1978). Hematologic comparisons of shot and live trapped cottontail rabbits. *Journal of Wildlife Diseases*, 14: 82-88.

Longair, J. (1991). Guidelines for euthanasia of domestic animals by firearms. *Canadian Veterinary Journal*, 32: 724-726.

Munck, A., Guyre, P. and Holbrook, N. (1984). Physiological Functions of Glucocorticoids in Stress and Their Relation to Pharmacological Actions. *Endocrine Reviews*, 5: 25-44.

Sharp, T. and Saunders, G. (2009) *Ground shooting of rabbits; welfare assessment*. [http://www.feral.org.au/wp-content/uploads/2012/02/rabbit\\_ground\\_shooting.pdf](http://www.feral.org.au/wp-content/uploads/2012/02/rabbit_ground_shooting.pdf).
